# Supplementary material for: Synthetic peptide-based latex agglutination test for the detection of Bacillus anthracis spores from soil samples
Source: Royal Society of Chemistry journal article supplement (doi:10.1039/d6ra02624a), 2026-04-21
Supplement: d6ra02624a1.pdf [file d6ra02624a1.pdf]

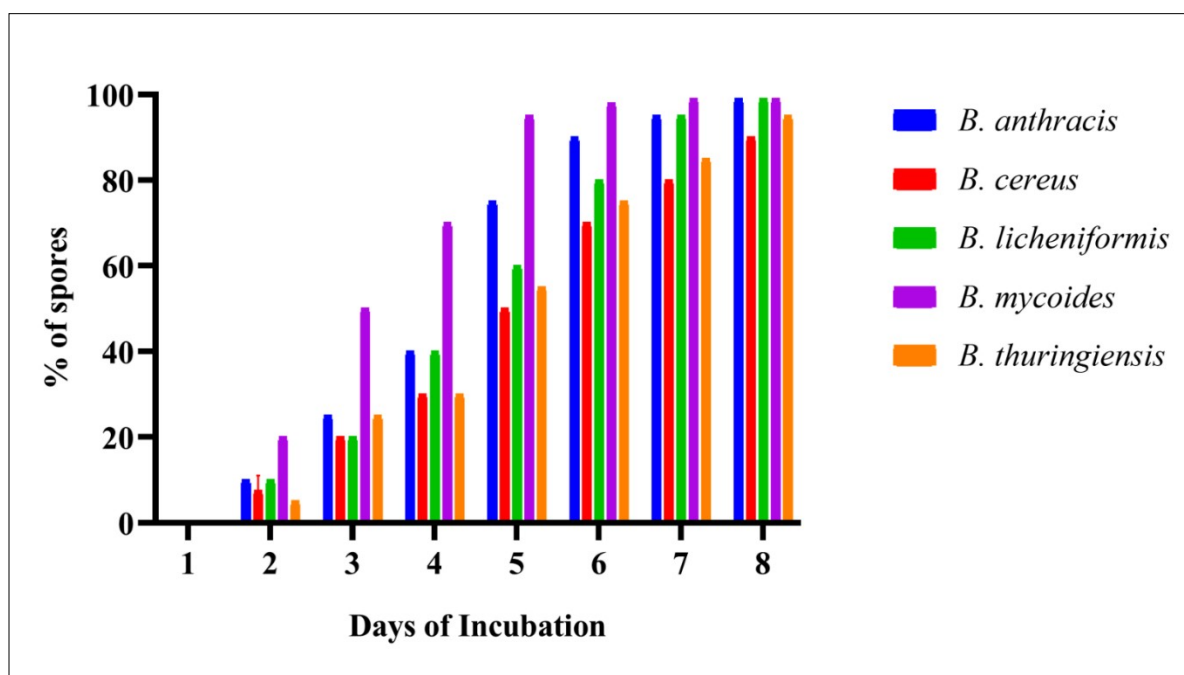

**Supplementary Fig. 1** Sporulation percentage of different *Bacillus* spp. at different time-points

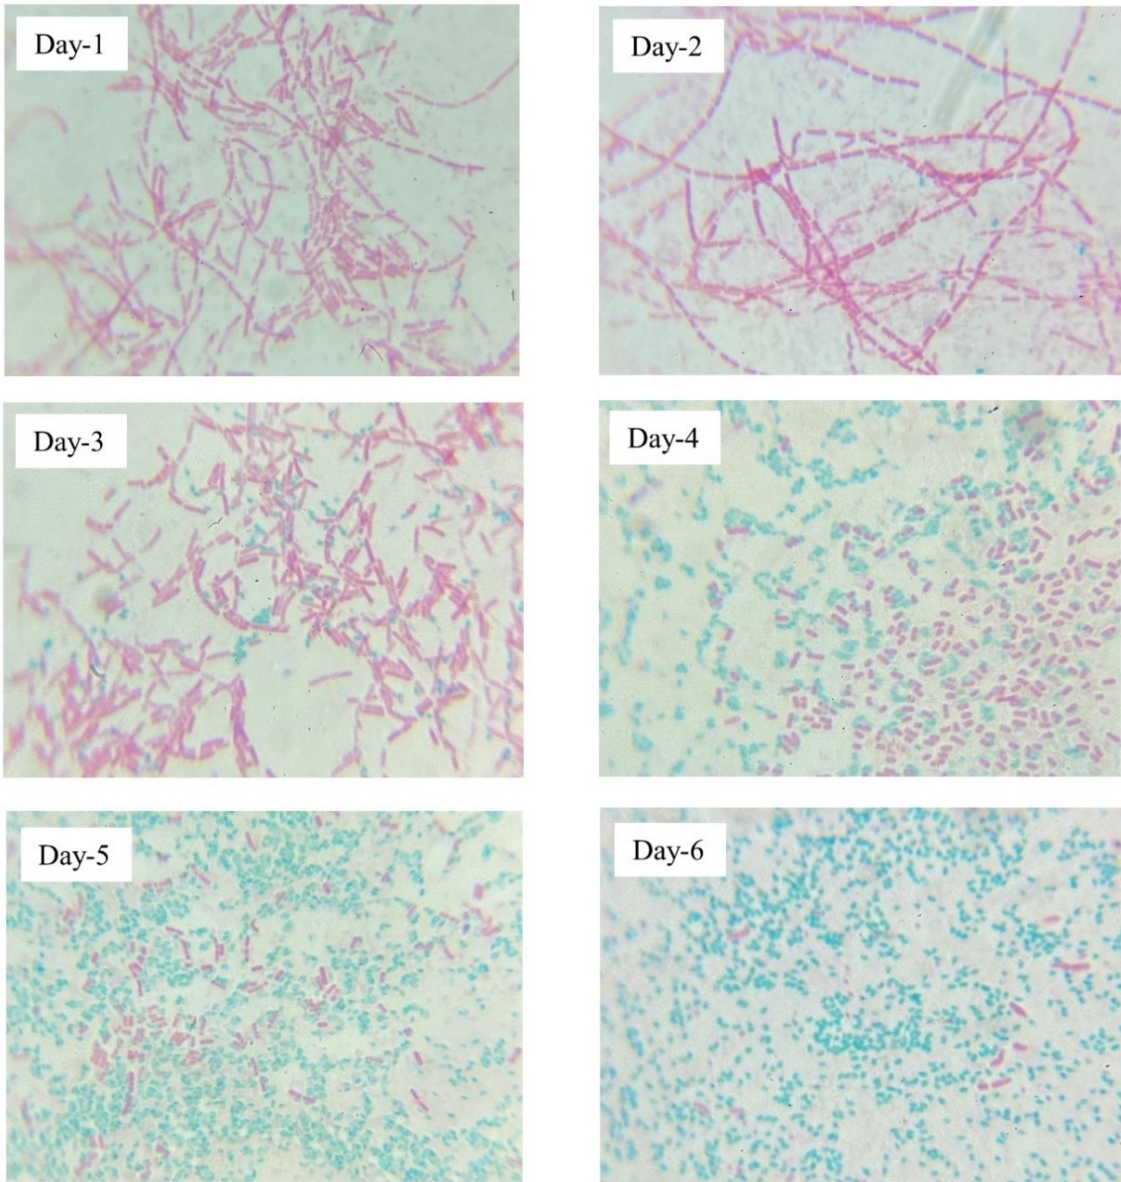

**Supplementary Fig. 2a** *B. anthracis* spore preparation (Schaffer and Fulton Spore Staining)

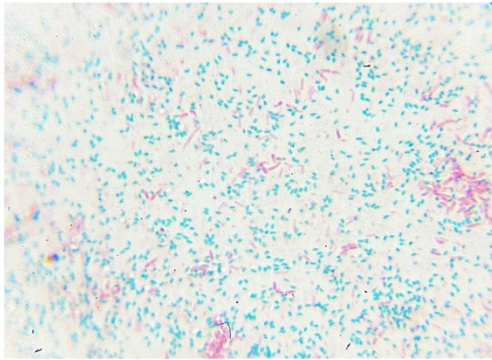

*B. cereus*

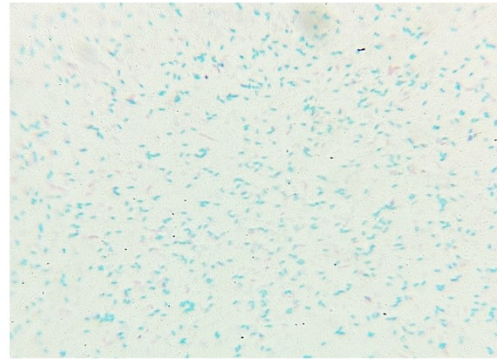

*B. licheniformis*

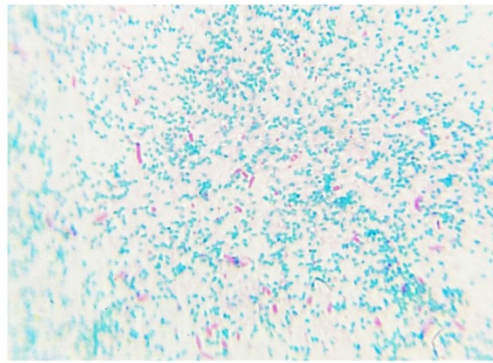

*B. anthracis*

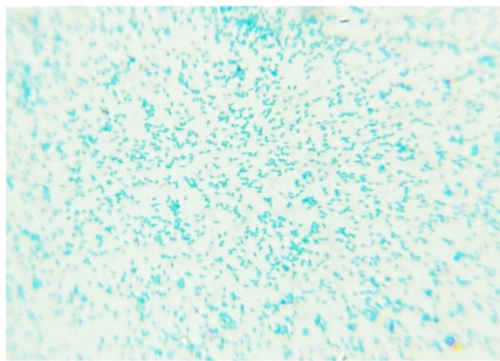

*B. mycoides*

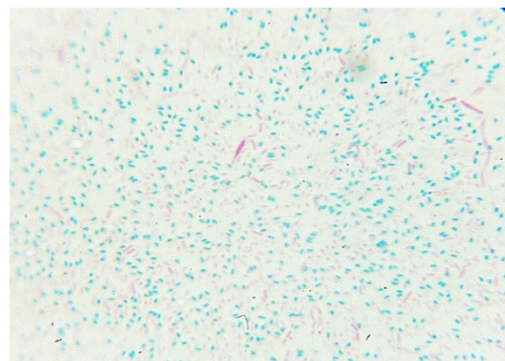

*B. thuringiensis*

**Supplementary Fig. 2b** Spores of different *Bacillus* spp. after 5-6 days of incubation (100X magnified)

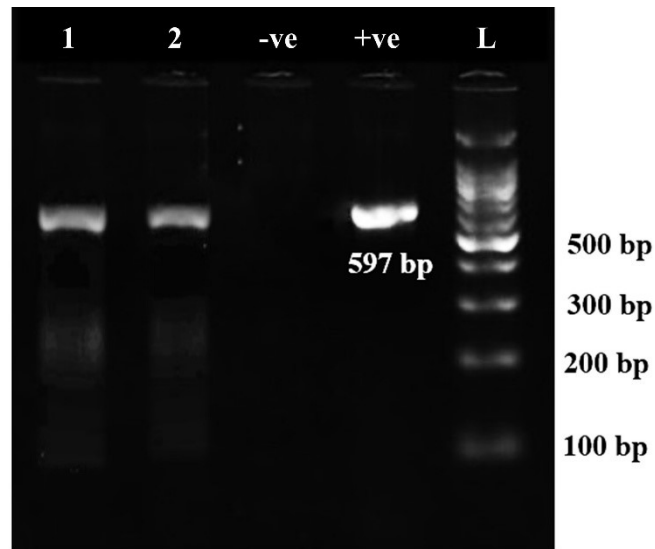

**Supplementary Fig. 3a** PCR targeting the *pag* gene with DNA extracted from inactivated and live spores. 1- live spores. 2- UV-inactivated spores. -ve – Negative control. +ve- Positive control.

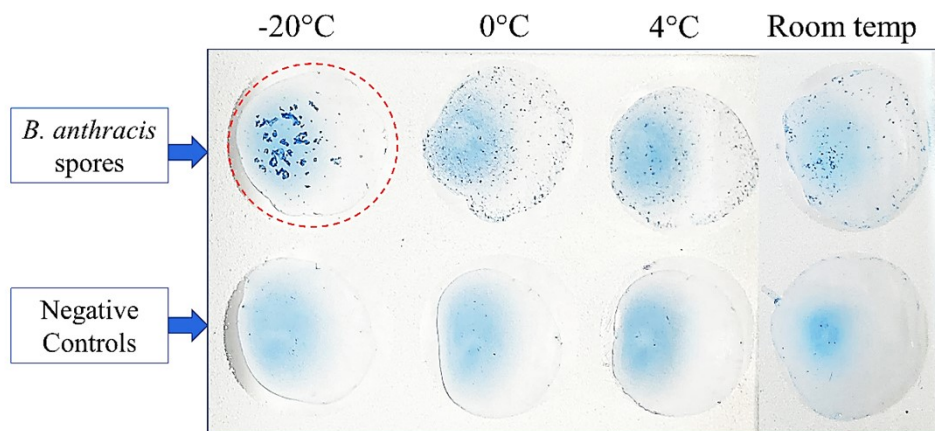

**Supplementary Fig. 3b** Agglutination pattern of inactivated *B. anthracis* spores stored at different temperatures (After 2 weeks of storage)

Sample: Pep-522 H2N-IYNVLPTTSLVLGK-CONH2 Analyzed date: 16-07-2022  
 Analyst: Dr.RS-SBio  
 Column: Kromasil-C18, 4.6\*250mm, 5µm  
 Solvent A: 0.1% Trifluoroacetic Acid in 100% Acetonitrile  
 Solvent B: 0.1% Trifluoroacetic Acid in 100% Water  
 Gradient:

|         | A    | B    |
|---------|------|------|
| 0.0min  | 24%  | 76%  |
| 25.0min | 49%  | 51%  |
| 25.1min | 100% | 0%   |
| 30.0min |      | Stop |

Volume: 10µl  
 Wavelength: 220nm  
 Flow rate: 1.0ml/min

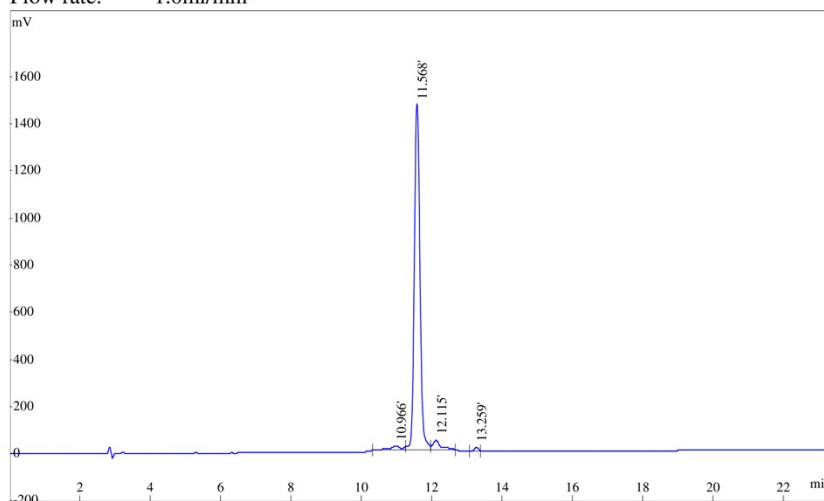

| Rank  | Time   | Conc.  | Area     | Height  |
|-------|--------|--------|----------|---------|
| 1     | 10.966 | 2.665  | 440952   | 16966   |
| 2     | 11.568 | 92.68  | 15333472 | 1464288 |
| 3     | 12.115 | 3.903  | 645647   | 40098   |
| 4     | 13.259 | 0.7508 | 124209   | 15089   |
| Total |        | 100    | 16544280 | 1536441 |

**Supplementary Fig. 4** HPLC report of PA-1 peptide

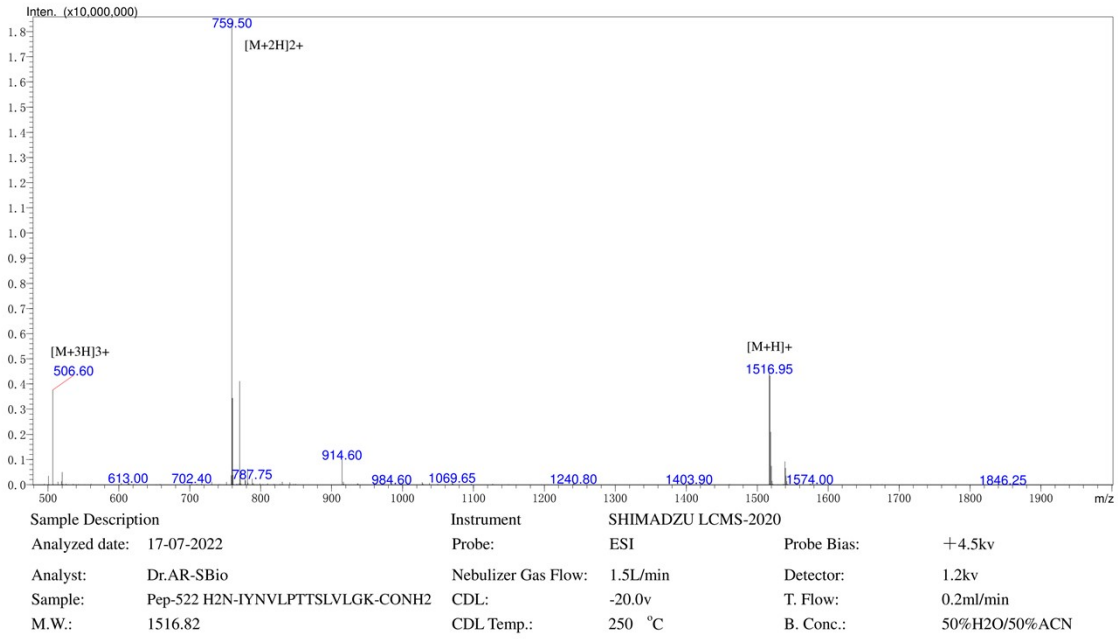

**Supplementary Fig. 5** Mass spectrophotometry report of PA-1 peptide

Sample: Pep-523 H2N-VTKFVYEVKKLAVEKL-CONH2 Analyzed date: 16-07-2022  
 Analyst: Dr.RS-SBio  
 Column: Kromasil-C18, 4.6\*250mm, 5µm  
 Solvent A: A: 0.1% Trifluoroacetic Acid in 100% Acetonitrile  
 Solvent B: B: 0.1% Trifluoroacetic Acid in 100% Water  
 Gradient:
 

|         | A    | B    |
|---------|------|------|
| 0.0min  | 24%  | 76%  |
| 25.0min | 49%  | 51%  |
| 25.1min | 100% | 0%   |
| 30.0min |      | Stop |

Volume: 10µl  
 Wavelength: 220nm  
 Flow rate: 1.0ml/min

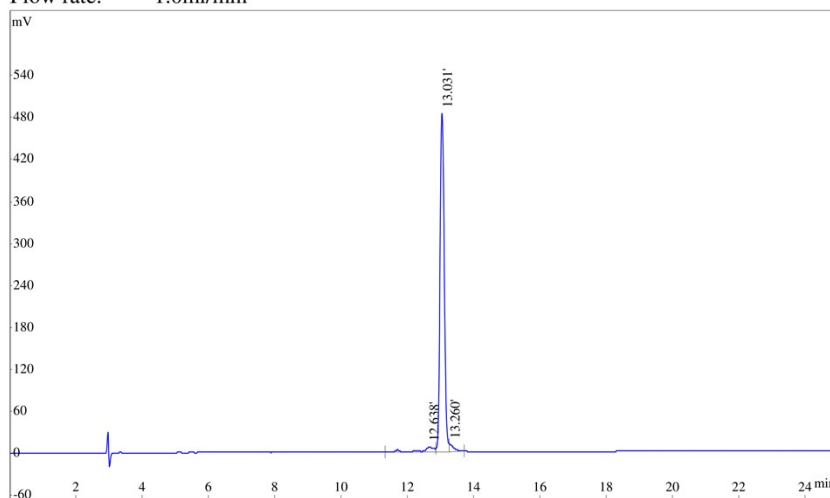

| Rank  | Time   | Conc. | Area    | Height |
|-------|--------|-------|---------|--------|
| 1     | 12.638 | 3.624 | 151447  | 6043   |
| 2     | 13.031 | 94.23 | 3938412 | 481815 |
| 3     | 13.260 | 2.145 | 89629   | 10588  |
| Total |        | 100   | 4179488 | 498446 |

**Supplementary Fig. 6** HPLC report of EA-1 peptide

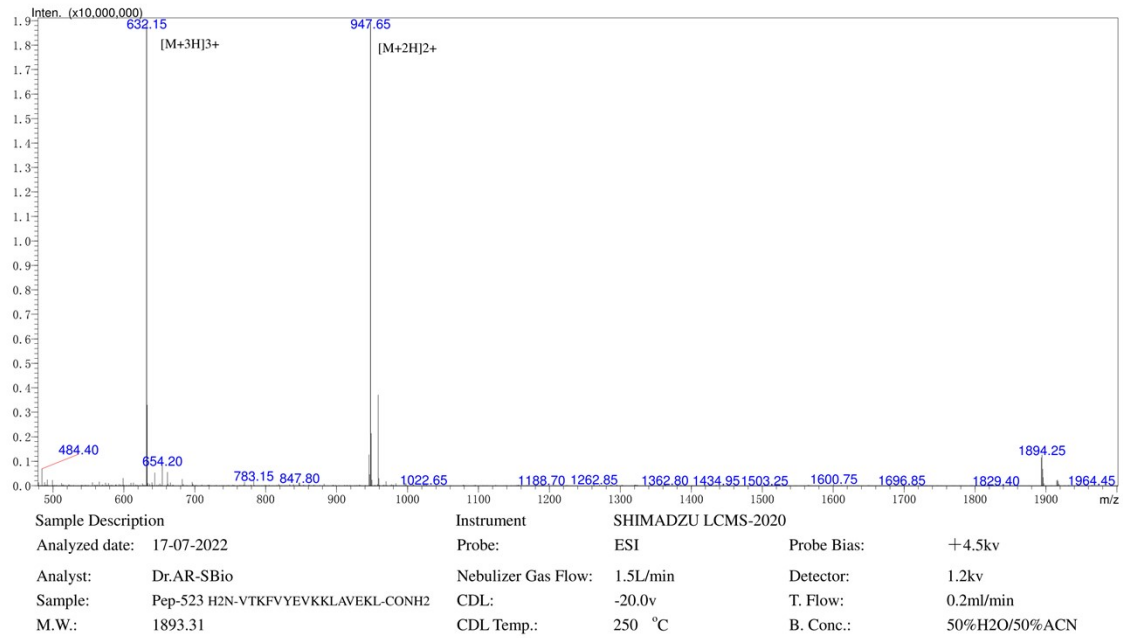

**Supplementary Fig. 7** Mass spectrophotometry report of EA-1 peptide

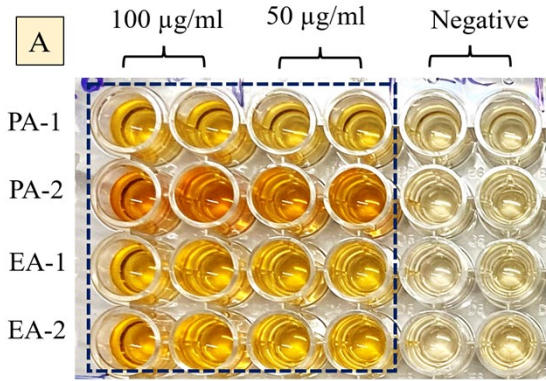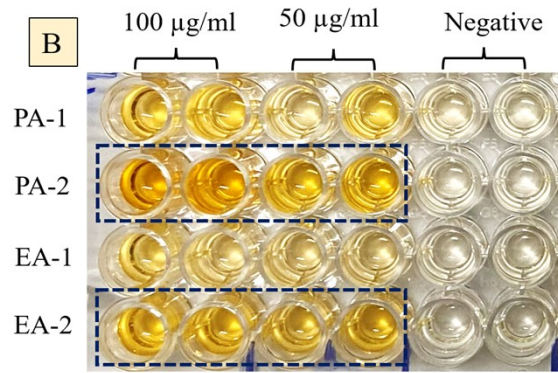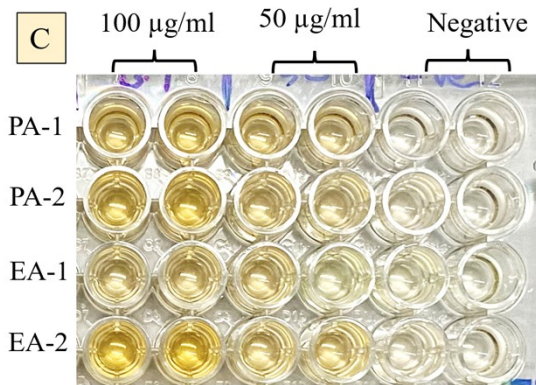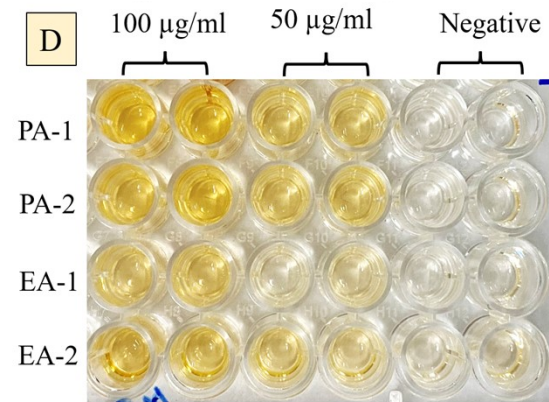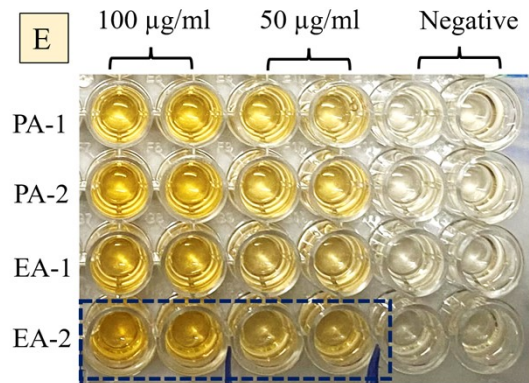

**Supplementary Fig. 8** Specificity of the peptide-derived IgY antibodies using in-house-developed indirect ELISA. A- Coating plates with inactivated spores of *B. anthracis*. B- Coating plates with inactivated spores of *B. cereus*. C- Coating plates with inactivated spores of *B. thuringiensis*. D- Coating plates with inactivated spores of *B. licheniformis*. E- Coating plates with inactivated spores of *B. mycoides*.

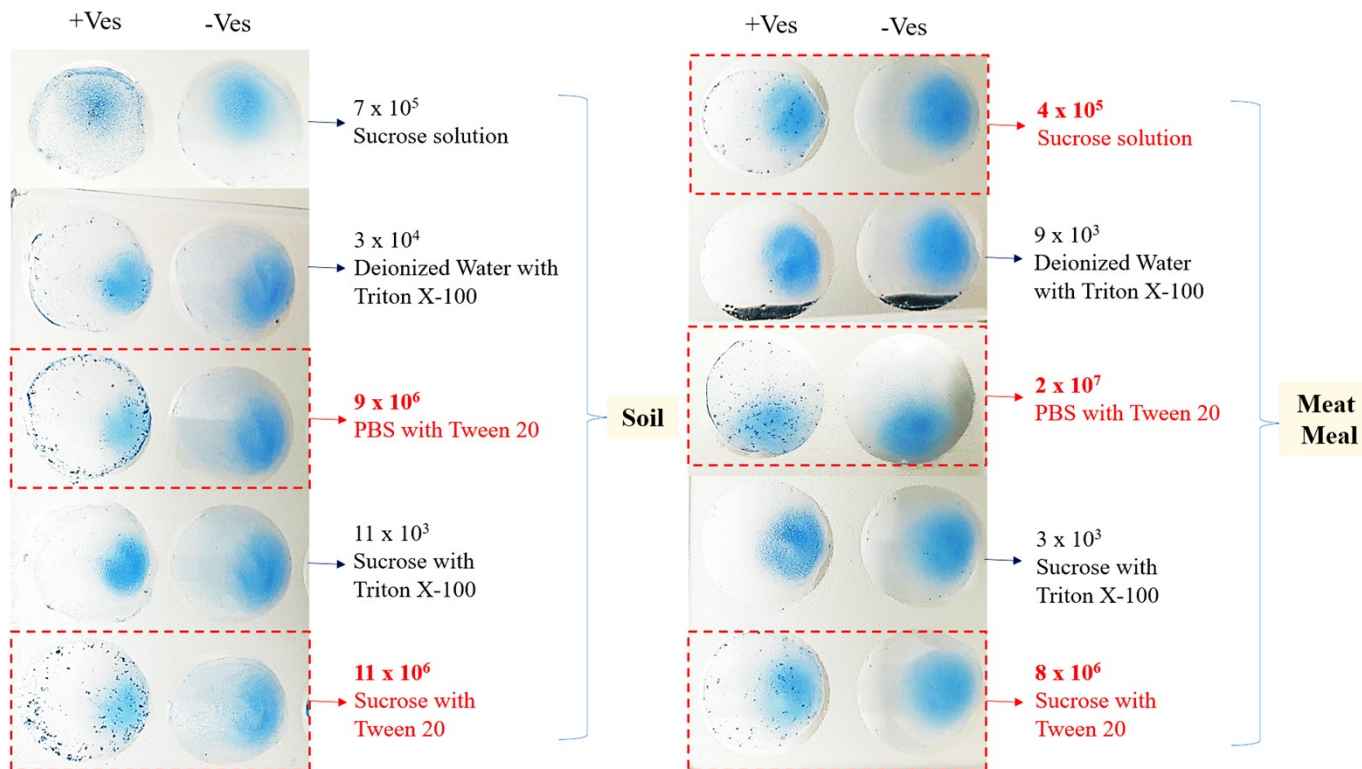

**Supplementary Fig. 9** Performance of LAT with the spores recovered through the GABRI technique using different carrier media

**Supplementary Table 1** Details of the primers used in this study

| Target Gene                     | Primer sequence               | Product Size (bp) | Reference |
|---------------------------------|-------------------------------|-------------------|-----------|
| <i>pag</i> (Protective antigen) | F: 5'-TCCTAACACTAACGAAGTCG-3' | 596               | [6, 40]   |
|                                 | R: 5'-CAGGTAGAAGGATATACGGT-3' |                   |           |

**Supplementary Table 2** Absorbance (OD) and cut-off values of in-house designed indirect ELISA

| <i>Bacillus</i> spp.    | Peptide | Mean absorbance at 592 nm |           |             | Cut-off Value |
|-------------------------|---------|---------------------------|-----------|-------------|---------------|
|                         |         | 50 µg/ml                  | 100 µg/ml | -ve control |               |
| <i>B. anthracis</i>     | PA-1    | 0.208                     | 0.300     | 0.109       | <b>0.219</b>  |
|                         | PA-2    | 0.477                     | 0.655     | 0.093       | <b>0.189</b>  |
|                         | EA-1    | 0.326                     | 0.234     | 0.094       | <b>0.201</b>  |
|                         | EA-2    | 0.354                     | 0.241     | 0.081       | <b>0.172</b>  |
| <i>B. cereus</i>        | PA-1    | 0.140                     | 0.180     | 0.091       | <b>0.190</b>  |
|                         | PA-2    | 0.210                     | 0.363     | 0.078       | <b>0.158</b>  |
|                         | EA-1    | 0.146                     | 0.125     | 0.088       | <b>0.177</b>  |
|                         | EA-2    | 0.219                     | 0.193     | 0.070       | <b>0.142</b>  |
| <i>B. thuringiensis</i> | PA-1    | 0.110                     | 0.118     | 0.067       | <b>0.142</b>  |
|                         | PA-2    | 0.093                     | 0.121     | 0.067       | <b>0.146</b>  |
|                         | EA-1    | 0.096                     | 0.089     | 0.067       | <b>0.140</b>  |
|                         | EA-2    | 0.103                     | 0.087     | 0.054       | <b>0.116</b>  |
| <i>B. mycooides</i>     | PA-1    | 0.155                     | 0.187     | 0.093       | <b>0.188</b>  |
|                         | PA-2    | 0.147                     | 0.177     | 0.089       | <b>0.180</b>  |
|                         | EA-1    | 0.190                     | 0.140     | 0.099       | <b>0.204</b>  |
|                         | EA-2    | 0.201                     | 0.132     | 0.080       | <b>0.161</b>  |
| <i>B. licheniformis</i> | PA-1    | 0.158                     | 0.175     | 0.090       | <b>0.183</b>  |
|                         | PA-2    | 0.144                     | 0.170     | 0.089       | <b>0.180</b>  |
|                         | EA-1    | 0.146                     | 0.108     | 0.097       | <b>0.201</b>  |
|                         | EA-2    | 0.1640                    | 0.125     | 0.097       | <b>0.190</b>  |

**Supplementary Table 3** Cost of production of the LAT assay

| <b>S. No.</b>                   | <b>Parameters</b>                                       | <b>Concentration used for 100 reactions</b> | <b>Amount (₹)</b>          |
|---------------------------------|---------------------------------------------------------|---------------------------------------------|----------------------------|
| 1.                              | Cost of antibody (Peptide and IgY/IgG antibody raising) | 1ml (200 µg/ml)                             | 295/-                      |
| 2.                              | Cost of latex beads                                     | 500 µL                                      | 800/-                      |
| 3.                              | Cost of buffer (50 mM MES)                              | 6.5 ml                                      | 190/-                      |
| 4.                              | Cost of other reagents (PBS, Glycine, Sodium azide)     | 1X PBS, 0.1% Glycine, 0.1% Sodium azide     | 50/-                       |
| 5.                              | Cost of Bovine serum Albumin (BSA)                      | 1%                                          | 10/-                       |
| 6.                              | Cost of EDAC buffer                                     | 50 mg                                       | 115/-                      |
| 7.                              | Labor cost                                              | 500/- ×3 days                               | 1500/-                     |
| 8.                              | Electricity charges                                     | @ 20 units                                  | 200/-                      |
| 9.                              | Equipment cost                                          | -                                           | 500/-                      |
| <b>Total cost/100 reactions</b> |                                                         |                                             | <b>3660/-</b>              |
| <b>Total cost/reaction</b>      |                                                         |                                             | <b>36.60/- (US \$0.42)</b> |
